# Supplementary material for: A Best-Worst Scaling Experiment to Prioritize Caregiver Concerns About ADHD Medication for Children
Source: Atypon-hosted journal article supplement (doi:10.1176/appi.ps.201300525), 2014-12-17

**Figure 1. Example of a Best-Worst Choice Task Question**

Think back to when you first learned that your child had ADHD.

Which of the items below was **MOST IMPORTANT** to you and which was **LEAST IMPORTANT** to you when **first deciding** to use or not to use ADHD medicine?

|                                                                   | <b>MOST<br/>Important</b> | <b>LEAST<br/>Important</b> |
|-------------------------------------------------------------------|---------------------------|----------------------------|
| ADHD medicine will help my child get along with others            | <input type="radio"/>     | <input type="radio"/>      |
| The school has pressured me to use ADHD medicine in my child      | <input type="radio"/>     | <input type="radio"/>      |
| ADHD medicine side effects outweigh its benefits                  | <input type="radio"/>     | <input type="radio"/>      |
| The doctor addresses my concerns about ADHD medicine              | <input type="radio"/>     | <input type="radio"/>      |
| ADHD medicine has risks that will affect my child's future health | <input type="radio"/>     | <input type="radio"/>      |
| ADHD medicine will help my child get better grades                | <input type="radio"/>     | <input type="radio"/>      |

**Figure 2. Rank Order of Best-Worst Scores for Across All Attribute Statements**

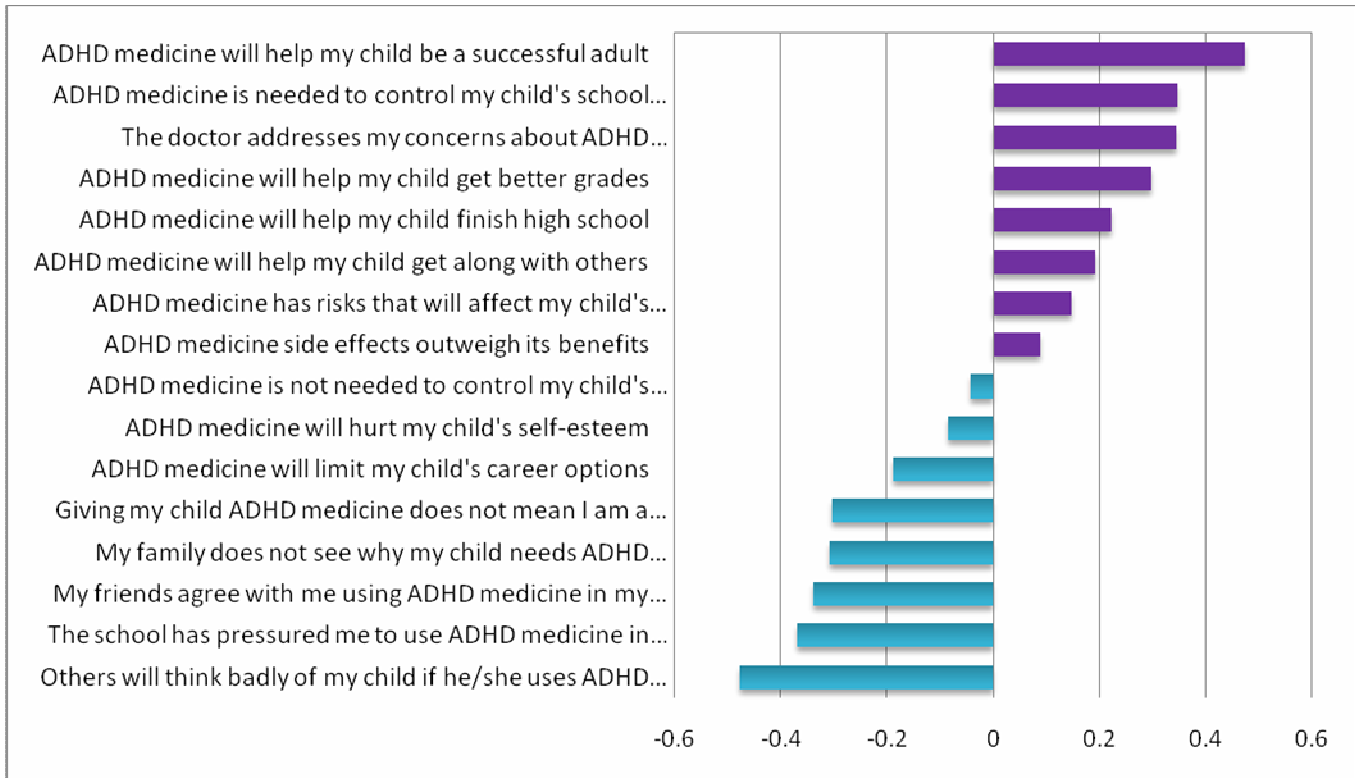

Supplement: appi.ps.201300525.ds001.pdf [file appi.ps.201300525.ds001.pdf]
